# Supplementary material for: Mixed Matrix Membranes Based on Torlon® and ZIF-8 for High-Temperature, Size-Selective Gas Separations
Source: MDPI journal article supplement (doi:10.3390/membranes11120982), 2021-12-15
Supplement: s1 [file s1]

# Supplementary Materials: Mixed Matrix Membranes Based on Torlon® and ZIF-8 for High-Temperature, Size-Selective Gas Separations

Matilde De Pascale <sup>1,2</sup>, Francesco Maria Benedetti <sup>1,3</sup>, Elsa Lasseguette <sup>4</sup>, Maria-Chiara Ferrari <sup>4</sup>, Kseniya Papchenko <sup>1,4</sup>, Micaela Degli Esposti <sup>1,5</sup>, Paola Fabbri <sup>1,5</sup> and Maria Grazia De Angelis <sup>1,4,5,\*</sup>

<sup>1</sup> Department of Civil, Chemical, Environmental and Materials Engineering, University of Bologna, 40131 Bologna, Italy, micaela.degliesti@unibo.it (M.D.E.); p.fabbri@unibo.it (P.F.)

<sup>2</sup> GVS S.p.A via Guido Rossa 30, 40069, Zola Predosa (BO), Italy; matilde.depascale@gvs.it (M.D.P.)

<sup>3</sup> Osmoses Inc., 444 Somerville Ave, Somerville, MA 02143, USA, fmben@mit.edu.

<sup>4</sup> School of Engineering, University of Edinburgh, Sanderson Building, Robert Stevenson Road, Edinburgh, EH9 3FB, Scotland, UK; K.Papchenko@sms.ed.ac.uk (K.P.); E.Lasseguette@ed.ac.uk (E.L.); M.Ferrari@ed.ac.uk (M.-C.F.); grazia.deangelis@ed.ac.uk (M.G.D.A.)

<sup>5</sup> Italian Consortium for Science and Technology of Materials (INSTM), 50121 Firenze, Italy

\* Correspondence: grazia.deangelis@ed.ac.uk

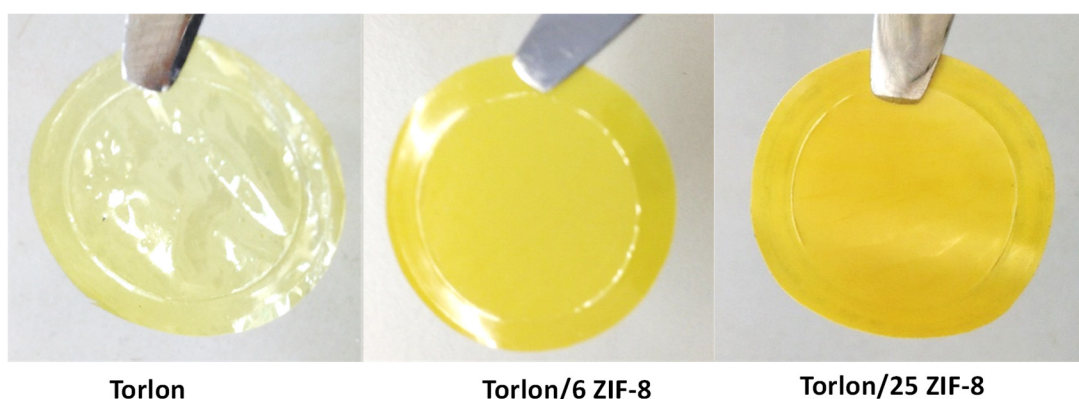

**Figure S1.** Pictures of the membranes produced: Torlon, Torlon/6 ZIF-8, Torlon/25 ZIF-8.

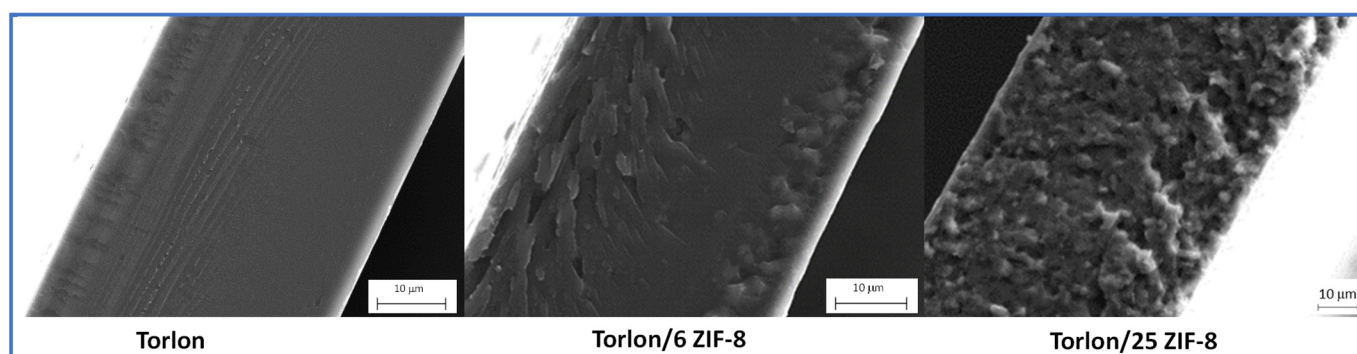

**Figure S2.** SEM images of cross sections of Torlon, Torlon/6 ZIF-8, Torlon/25 ZIF-8 samples.

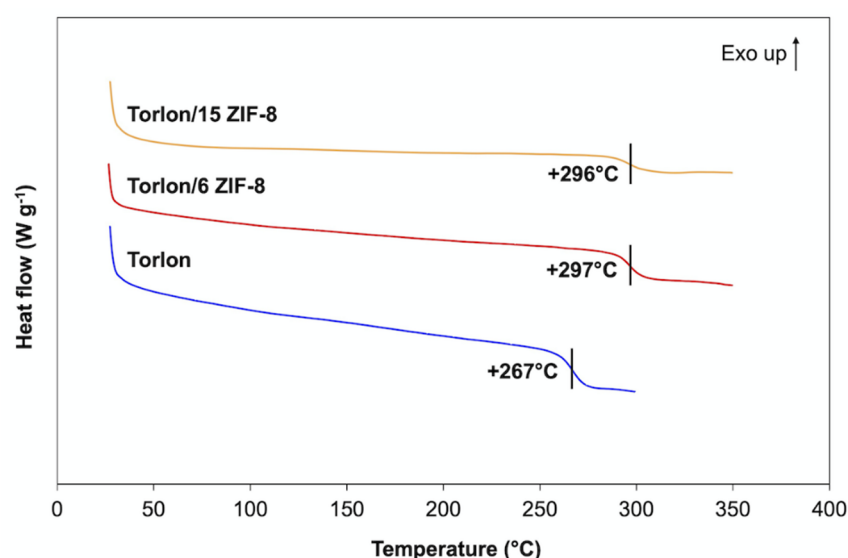

Figure S3. DSC thermograms of Torlon, Torlon/6 ZIF-8 and Torlon/15 ZIF-8 samples.

Table S1. MMM samples produced, thickness and tests performed.

| ZIF-8 Weight % | Sample ID       | Thickness ( $\mu\text{m}$ ) | Permeability Tests                                | SEM Tests | DSC Tests |
|----------------|-----------------|-----------------------------|---------------------------------------------------|-----------|-----------|
| 0              | Torlon          | 10.5 $\pm$ 1.4              | He, CO <sub>2</sub> , 35°C, 65°C                  | x         | x         |
| 6              | Torlon/6 ZIF-8  | 45.5 $\pm$ 1.9              | He, H <sub>2</sub> , CO <sub>2</sub> , 35°C, 65°C | x         | x         |
| 15             | Torlon/15 ZIF-8 | -                           | -                                                 | -         | x         |
| 25             | Torlon/25 ZIF-8 | 64.7 $\pm$ 5.0              | He, CO <sub>2</sub> , 35°C, 65°C                  | x         | -         |

Table S2. Gas permeability data in Torlon® flat sheet membranes from this work and the literature.

| Polymer Density | Permeability (Barrer) |                |                  |                    |                    |                 | T        | Source    | Notes |
|-----------------|-----------------------|----------------|------------------|--------------------|--------------------|-----------------|----------|-----------|-------|
|                 | He                    | H <sub>2</sub> | O <sub>2</sub>   | N <sub>2</sub>     | CH <sub>4</sub>    | CO <sub>2</sub> |          |           |       |
| 1.252           | -                     | 3.730          | 0.130            | 0.018              | 0.013              | 0.541           | °C<br>35 | [1]       | a     |
| n.r.            | 5.53                  | 4.44           | 0.212            | 0.037              | 0.030              | 0.83            | 35       | [2]       | b     |
| n.r.            | 4.4 $\pm$ 0.2         | -              | 0.12 $\pm$ 0.006 | 0.014 $\pm$ 0.0007 | 0.009 $\pm$ 0.0004 | 0.47 $\pm$ 0.02 | 35       | [3]       | c     |
| 1.252 [1]       | 3.9 $\pm$ 0.6         | -              | -                | -                  | -                  | 0.47 $\pm$ 0.06 | 35       | This work | d     |

<sup>a</sup> Torlon 4000 TF, solvent NMP, dense films 50 microns, thermal treatment at 250°C for 12 h, upstream pressure 3.5 atm

<sup>b</sup> Torlon 4000 T, solvent NMP, upstream pressure 10 atm

<sup>c</sup> Torlon 4000T-LV, dense film, solvent NMP, membrane treated at 310°C for 1d

<sup>d</sup> Torlon 4000TF, dense film, solvent NMP, membrane treated at 200°C under vacuum overnight, upstream pressure 1.3 bar, downstream pressure vacuum.

Table S3. Gas permeability data in Torlon/ZIF-8 mixed matrix membranes from this work and for ZIF-8 from the literature. Data marked with an asterisk are estimated values based on linear interpolation between permeability and kinetic diameter in each matrix.

| Permeability (Barrer) | He              | H <sub>2</sub> | CO <sub>2</sub> | He             | H <sub>2</sub> | CO <sub>2</sub> |
|-----------------------|-----------------|----------------|-----------------|----------------|----------------|-----------------|
|                       |                 | 35°C           |                 |                | 65°C           |                 |
| Torlon                | 3.9 $\pm$ 0.6   | 2.43*          | 0.47 $\pm$ 0.06 | 6.4 $\pm$ 1.0  | 3.97*          | 0.72 $\pm$ 0.09 |
| Torlon/6 ZIF-8        | 5.3 $\pm$ 0.2   | 3.8 $\pm$ 0.2  | 0.97 $\pm$ 0.04 | 9.0 $\pm$ 0.4  | 7.0 $\pm$ 0.3  | 1.4 $\pm$ 0.1   |
| Torlon/25 ZIF-8       | 10.0 $\pm$ 0.9  | 6.66*          | 2.20 $\pm$ 0.2  | 19.6 $\pm$ 1.6 | 13.0*          | 4.2 $\pm$ 0.4   |
| 20-35°C               |                 |                |                 |                |                |                 |
| ZIF-8 [4,5]           | 3000 $\pm$ 1322 |                | 1640 $\pm$ 712  |                |                |                 |

**Table S4.** Ideal selectivity values in Torlon/ZIF-8 mixed matrix membranes from this work and 8 from the literature.

| Ideal Selectivity | He/CO <sub>2</sub> | H <sub>2</sub> /CO <sub>2</sub> | He/CO <sub>2</sub> | H <sub>2</sub> /CO <sub>2</sub> |
|-------------------|--------------------|---------------------------------|--------------------|---------------------------------|
|                   | 35°C               |                                 | 65°C               |                                 |
| <b>Torlon</b>     | 8.2                | 5.2*                            | 8.9                | 5.5*                            |
| Torlon/6 ZIF-8    | 5.4                | 3.9                             | 6.6                | 5                               |
| Torlon/25 ZIF-8   | 5.0                | 3.0*                            | 4.6                | 3.1*                            |
| <b>20–35°C</b>    |                    |                                 |                    |                                 |
| ZIF-8 [4,5]       | 1.8                | 3.9                             |                    |                                 |

**Table S5.** Gas diffusivity and ideal diffusivity-selectivity in Torlon/ZIF-8 mixed matrix membranes.

|                 | Diffusivity<br>(cm <sup>2</sup> /s) |                             |                            |                            | Diffusivity-Selectivity<br>$\alpha_D$ |      |
|-----------------|-------------------------------------|-----------------------------|----------------------------|----------------------------|---------------------------------------|------|
|                 | He                                  | CO <sub>2</sub>             | He                         | CO <sub>2</sub>            | He/CO <sub>2</sub>                    |      |
|                 | 35°C                                |                             | 65°C                       |                            | 35°C                                  | 65°C |
| Torlon          | (1.6±0.4)×10 <sup>-7</sup>          | (3.5±1)×10 <sup>-10</sup>   | (1.6±0.4)×10 <sup>-7</sup> | (1.4±0.4)×10 <sup>-9</sup> | 448                                   | 116  |
| Torlon/6 ZIF-8  | (4.4±0.4)×10 <sup>-7</sup>          | (9.6±0.8)×10 <sup>-10</sup> | (4.5±0.4)×10 <sup>-7</sup> | (2.3±0.2)×10 <sup>-9</sup> | 457                                   | 198  |
| Torlon/25 ZIF-8 | (6.6±1)×10 <sup>-7</sup>            | (2.3±0.4)×10 <sup>-9</sup>  | (1.3±0.2)×10 <sup>-6</sup> | (9.3±1.4)×10 <sup>-9</sup> | 290                                   | 139  |

## References

1. W.F.; Yong, F.Y.; Li, T.S.; Chung, Y.W.; Tong, Molecular interaction, gas transport properties and plasticization behavior of cPIM-1/Torlon blend membranes, *J. Memb. Sci.* 462 (2014) 119–130. <https://doi.org/10.1016/j.memsci.2014.03.046>.
2. S.S.; Hosseini, T.S.; Chung, Carbon membranes from blends of PBI and polyimides for N<sub>2</sub>/CH<sub>4</sub> and CO<sub>2</sub>/CH<sub>4</sub> separation and hydrogen purification, *J. Memb. Sci.* 328 (2009) 174–185. <https://doi.org/10.1016/j.memsci.2008.12.005>.
3. M.R.; Kosuri, W.J.; Koros, Defect-free asymmetric hollow fiber membranes from Torlon®, a polyamide-imide polymer, for high-pressure CO<sub>2</sub> separations, *J. Memb. Sci.* 320 (2008) 65–72. <https://doi.org/10.1016/j.memsci.2008.03.062>.
4. H.; Bux, F.; Liang, Y.; Li, J.; Cravillon, M.; Wiebcke, J.; Caro, Zeolitic Imidazolate Framework Membrane with Molecular Sieving Properties by Microwave-Assisted Solvothermal Synthesis, *J. Am. Chem. Soc.* 131 (2009) 16000–16001. <https://doi.org/10.1021/ja907359t>.
5. K.S.; Park, Z.; Ni, A.P.; Cote, J.Y.; Choi, R.; Huang, F.J. Uribe-Romo, H.K.; Chae, M. O’Keeffe, O.M.; Yaghi, Exceptional chemical and thermal stability of zeolitic imidazolate frameworks, *Proc. Natl. Acad. Sci.* 103 (2006) 10186–10191. <https://doi.org/10.1073/pnas.0602439103>.
6. Q.; Song, S.K.; Nataraj, M. V.; Roussanova, J.C.; Tan, D.J.; Hughes, W.; Li, P.; Bourgoïn, M.A.; Alam, A.K.; Cheetham, S.A. Al-Muhtaseb, E.; Sivaniah, Zeolitic imidazolate framework (ZIF-8) based polymer nanocomposite membranes for gas separation, *Energy Environ. Sci.* 5 (2012) 8359. <https://doi.org/10.1039/c2ee21996d>.
